## Articles of interest in other COB journals

From *Journal of Cell Science*

### **The Hippo tumor-suppressor pathway regulates apical-domain size in parallel to tissue growth**

**Fisun Hamaratoglu, Kathleen Gajewski, Leticia Sansores-Garcia, Clayton Morrison, Chunyao Tao and Georg Halder**

Hamaratoglu, F. et al. 2009. *J. Cell Sci.* doi:10.1242/jcs.046482

### **In vivo imaging reveals a role for Cdc42 in spindle positioning and planar orientation of cell divisions during vertebrate neural tube closure**

**Esther K. Kieserman and John B. Wallingford**

Kieserman, E. K. and Wallingford, J. B. 2009. *J. Cell Sci.* doi:10.1242/jcs.042135
